# Supplementary material for: B Cells Specific CpG Induces High IL-10 and IL-6 Expression In Vitro in Neuro-Behçet’s Disease
Source: MDPI journal article supplement (doi:10.3390/cells11081306), 2022-04-12
Supplement: s1 [file s1]

Supplementary Table S1: primers used in quantitative real time PCR

| Gene           | forward                         | Reverse                         |
|----------------|---------------------------------|---------------------------------|
| TGF- $\beta$   | 5'-GCCCTGGACACCAACTATTG-3       | 5'-CTGGTCCAGGCTCCAAAT-3'        |
| Il-12p35       | 5'-CCACTCCAGACCCAGGAATGT-3'     | 5'-CCTCCACTGTGCTGGTTTTATCT-3'   |
| Ebi3           | 5'-TCATTGCCACGTACAGGCTC-3'      | 5'-GGGTCGGGCTTGATGATGTG-3'      |
| Il-6           | 5'-ATGAACTCCTTCTCCACAAGCGC-3'   | 5'-GAAGAGCCCTCAGGCTGGACTG-3'    |
| Il-6st         | 5'-CACCTGTATCACAGACTGGCA-3'     | 5'-TTCAGGGCTTCCTGGTCCATCA-3'    |
| Il-6 $\alpha$  | 5'-GACAATGCCACTGTTCAGT-3'       | 5'-GCTAACTGGCAGGAGAACTT-3'      |
| Il-10          | 5'-CGAGATGCCTTCAGCAGAGT-3'      | 5'-CCCTTAAAGTCCTCCAGCAA-3'      |
| Il-10 $\alpha$ | 5'-GCTCCTGAGGTATGGAATAGAGTCC-3' | 5'-TATGTGTCATTTGCGGGGGC-3'      |
| Il-10 $\beta$  | 5'-TGGATGACACCATTATTGGACCC-3'   | 5'-TTTGCTCACAGACAGGCTCACT-3'    |
| GAPDH          | 5'-CCACATCGCTCAGACACCAT-3       | 5'GGCAACAATATCCACTTTACCAGAGT-3' |
